# Supplementary material for: Genomic EWSR1 Fusion Sequence as Highly Sensitive and Dynamic Plasma Tumor Marker in Ewing Sarcoma
Source: Oxford University Press journal article supplement (doi:10.1158/1078-0432.ccr-15-3028), 2016-06-09
Supplement: 10780432ccr153028-sup-159506_1_supp_3366673_x2sdyk.docx [file 10780432ccr153028-sup-159506_1_supp_3366673_x2sdyk.docx]

**Supplementary Table 1:** Sequences of primers used in nested multiplex PCR assays

|  |  |  |  |
| --- | --- | --- | --- |
|  |  | **primer** | **sequence 5´-3´** |
| ***ERG:*** | external | ERG_rv 1 | agtatacatcagggcaagccaagagacagg |
|  | internal | ERG_rv 2 | aatatgacctggagggggctttggaattag |
|  | external | ERG_rv 3 | ttgattcatgttctccgatagagtttgtgg |
|  | internal | ERG_rv 4 | agcctccgccaggtctttagtagtaagtgc |
|  | external | ERG_rv 5 | ctcccatagagaaagcaactccacagacc |
|  | internal | ERG_rv 6 | tctactcaaaccttggcattgcctcttagc |
|  | external | ERG_rv 7 | ccagagtgtttcagcttccgtcattttc |
|  | internal | ERG_rv 8 | gaacattgctgccagatcagtcttcctg |
|  | external | ERG_rv 9 | aaactcagggtcatgggagccaacac |
|  | internal | ERG_rv 10 | gggagccaacactgtacctttcgactg |
|  | external | ERG_rv 11 | tgatcatttcaacaccctctccatttctc |
|  | internal | ERG_rv 12 | aggcaatgaactcatatgcttggcagaag |
|  | external | ERG_rv 13 | gaggtgtctgagtttgccacccttgc |
|  | internal | ERG_rv 14 | agagagggagtcccaaccaacatcc |
|  | external | ERG_rv 15 | tcagattctcaagatggaagtgaaacttgg |
|  | internal | ERG_rv 16 | gtgaaacttggagccttggtgtactcctg |
|  |  |  |  |
| ***EWS:*** | external | EWS_fw 1 | agttacccaccccaaactggatcctacag |
|  | internal | EWS_fw 2 | gccaagctccaagtcaatatagccaacag |
|  | external | EWS_fw 3 | cagggggaatactctttgccattgtttgc |
|  | internal | EWS_fw 4 | catctttagggcatggcattccagctaac |
|  | external | EWS_fw 5 | caacatcgtttttggcctccctatcagtc |
|  | internal | EWS_fw 6 | ggcagctattgcaggccactatgattttg |
|  | external | EWS_fw 7 | atttatggagctcagcccctagcagtgtg |
|  | internal | EWS_fw 8 | agcccctagcagtgtgctaaagccctaag |
|  | external | EWS_fw 9 | gtgccttggttagtgccttggaattgag |
|  | internal | EWS_fw 10 | tccaggagaaagtacatcaggcagtggtg |
|  | external | EWS_fw 11 | ccagtatacttcgttgggtcggggagaac |
|  | internal | EWS_fw 12 | gaaaccagagctttcagttcccttcatgg |
|  | external | EWS_fw 13 | catccccttttccctatctg |
|  | internal | EWS_fw 14 | agtactcagccggcagcataatgaaaagtg |
|  | external | EWS_fw 15 | ccatggctttccccataggtttttcaac |
|  | internal | EWS_fw 16 | ctggatgcgtcctctgatgtgtgttgtag |
|  | external | EWS_fw 17 | gctgccctgaagaaaggcatagtgacaag |
|  | internal | EWS_fw 18 | tttggagatgtgtttagccagtgcccttc |
|  | external | EWS_fw 19 | accagtgtgatattcttgctgtcaagg |
|  | internal | EWS_fw 20 | cttgttgtctctgaaaggcccacctgtag |
|  |  |  |  |
| ***FLI1:*** | external | FLI1_Ex_115201_rv | caaggaaagacgtgcatgttactccccactcag |
|  | internal | FLI1_In_115193_rv | cgtgcatgttactccccactcaggtgtctgg |
|  | external | FLI1_Ex_106295_rv | accagaggccagcaacacagcgacatcag |
|  | internal | FLI1_In_106157_rv | tgctaagaaggctggcagcacctaaccctg |
|  | external/internal | FLI1_96637_rv | gcccacctctaataaggcagtg |
|  | external/internal | FLI1_87089_rv | ctaagagcacgcactgaacctg |
|  | external/internal | FLI1_114289_rv | tgaggaaatcatggtagagagctg |
|  | external/internal | FLI1_105426_rv | ctcagctgctttgaacctccag |
|  | external | FLI1_Ex_95796_rv | tgtgtgagctgacgtagatggggcctgtgg |
|  | internal | FLI1_In_95661_rv | acctagcccccatacgctgcactctacaagg |
|  | external/internal | FLI1_86119_rv | caaagtgtggctatgtggatgc |
|  | external | FLI1_Ex_113169_rv | aacaactgtgcaggaagcaaaggagag |
|  | internal | FLI1_In_113057_rv | tggcaagagggaaagaaatgcagtgag |
|  | external/internal | FLI1_104483_rv | gctgaccctgctgtgtggag |
|  | external/internal | FLI1_95037_rv | tccttccctttgcttcaacatc |
|  | external | FLI1_Ex_85221_rv | aagaatgcttgcctctccgtccctgacg |
|  | internal | FLI1_In_85187_rv | tccctcaggctgaaacctcactgctggag |
|  | external/internal | FLI1_112293_rv | gtccaaatcctgcctctccttc |
|  | external | FLI1_Ex_103571_rv | acactttacatgctgagaacacaacaatcg |
|  | internal | FLI_In_103551_rv | acaacaatcgctagacaaacgtccttcctc |
|  | external | FLI_Ex_94093rv | ccgaataagttttaaagcagcttggctatc |
|  | internal | FLI_In_94061rv | tgtatagtatccttcacgacccttggtacgg |
|  | external/internal | FLI1_84306_rv | cagggtggtggttagttttgtg |
|  | external/internal | FLI1_111519_rv | cccatatcatctttcaaggactgg |
|  | external | FLI1_Ex_102570_rv | aagagcactccttcttttgtggcctggcag |
|  | internal | FLI1_In_102562_rv | ccttcttttgtggcctggcaggtgagcag |
|  | external/internal | FLI1_93289_rv | tcttgttctgcttcatgacctg |
|  | external/internal | FLI1_83458_rv | caccagcttaattgcccagac |
|  | external/internal | FLI1_110579_rv | gggctgatgaccacagagaaag |
|  | external/internal | FLI1_101448_rv | cgcatcctacagaactctagctgatac |
|  | external | FLI1_Ex_92161_rv | acaatctgggtccagacaaccgcccagtg |
|  | internal | FLI1_In_92143_rv | cgcccagtgtgtctccaagaaaatctg |
|  | external/internal | FLI_seq_rv82350 | tctggcctcaggtgatcc |
|  | external | FLI1_Ex_109692_rv | gggcattttctgagatgtcttgcagaggaagtg |
|  | internal | FLI1_In_109674_rv | gaggaagtgcaatgttggcagcggcag |
|  | external/internal | FLI1_100452_rv | ttggcctttcactagaagatgc |
|  | external/internal | FLI1_91179_rv | ttgtggctgctattgtaaatggataac |
|  | external | FLI1_Ex_81765_rv | cctgcagtacttcctccaccggagtgaagg |
|  | internal | FLI1_In_81650_rv | aagcacaaagaatcagcaccctctccccttg |
|  | external/internal | FLI1_108916_rv | ccctctctgaaagctatctggtaac |
|  | external | FLI1_Ex_99259_rv | tgaatttatggagggacacggggcaggg |
|  | internal | FLI1_In_99221_rv | cagctggagcatcctggacgtgtctttaagatg |
|  | external/internal | FLI1_90217_rv | tgtatggcaggtagaggacacg |
|  | external/internal | FLI1_80785_rv | accaccttctcaggcatttgtc |
|  | external/internal | FLI1_108088_rv | tgccctaggggtatgaagaacc |
|  | external/internal | FLI1_98444_rv | gaaagaatttgactgataagcgtggac |
|  | external | FLI1_Ex_89180_rv | gctctctgtttccttcacaccccatgc |
|  | internal | FLI1_In_89139_rv | atggtccttcccttagaagagcctttg |
|  | external/internal | FLI1_107250_rv | acctgaatgcagaagcctgaac |
|  | external/internal | FLI1_97613_rv | agggtagggaggaaaggcaatg |
|  | external/internal | FLI1_88029_rv | gaacacgcaagctggttttctg |
